# Supplementary material for: Controllable supramolecular polymerization through self-sorting of aliphatic and aromatic motifs
Source: Royal Society of Chemistry journal article supplement (doi:10.1039/c5py01923k), 2015-12-28
Supplement: c5py01923k1.pdf [file c5py01923k1.pdf]

## Supporting information

### Controllable Supramolecular Polymerization through Self-

#### Sorting of Aliphatic and Aromatic Motifs

Linghui Chen, Zehuan Huang, Jiang-Fei Xu, Zhiqiang Wang and Xi Zhang\*

Key Lab of Organic Optoelectronics & Molecular Engineering, Department of Chemistry, Tsinghua.

Email: xi@mail.tsinghua.edu.cn

#### 1. Characterization of molecular weight of supramolecular polymers by AUC

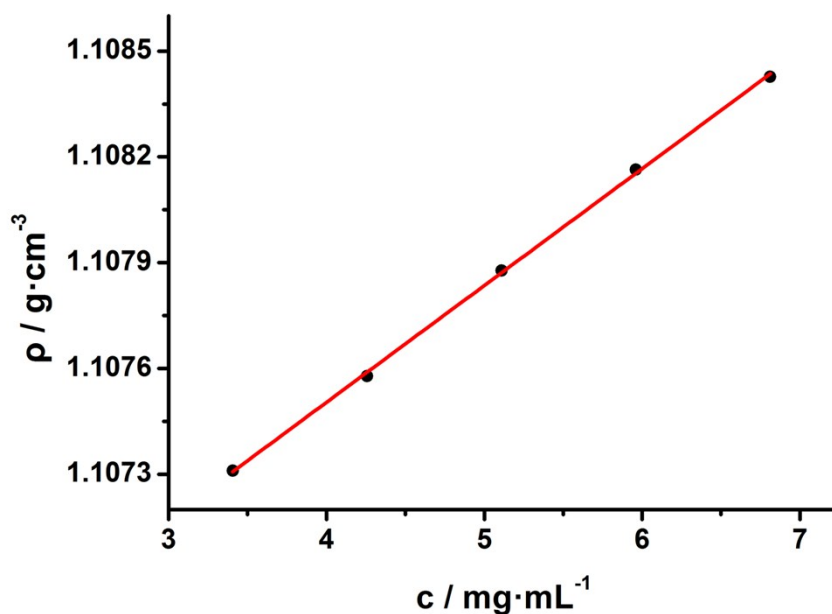

**Fig. S1** Fitting curve of the concentration-dependent density data of supramolecular polymers.

As shown in Fig. S1, the partial specific volume was calculated to be  $0.605 \text{ mg}^{-1}\text{mL}$ , and the equation was  $y = 1.10618 x + 0.00033118$  studied by an Anton Paar DMA 5000 densimeter.

## 2. Characterization of the difference of absorbance after adding CB[7] to Np-C<sub>6</sub>-Np-CB[8] by UV-vis spectra.

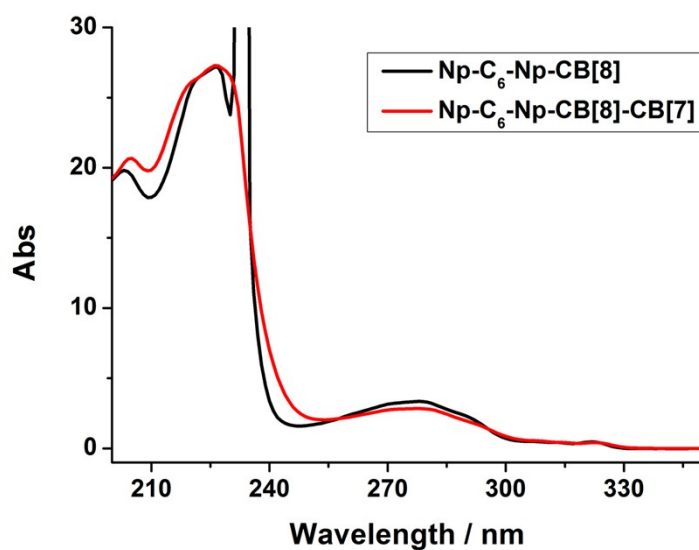

**Fig. S2** Absorbance of Np-C<sub>6</sub>-Np-CB[8] and Np-C<sub>6</sub>-Np-CB[8]-CB[7].

## 3. ITC studies of self-sorting system.

(1) Host-guest interaction between Np and cucurbiturils

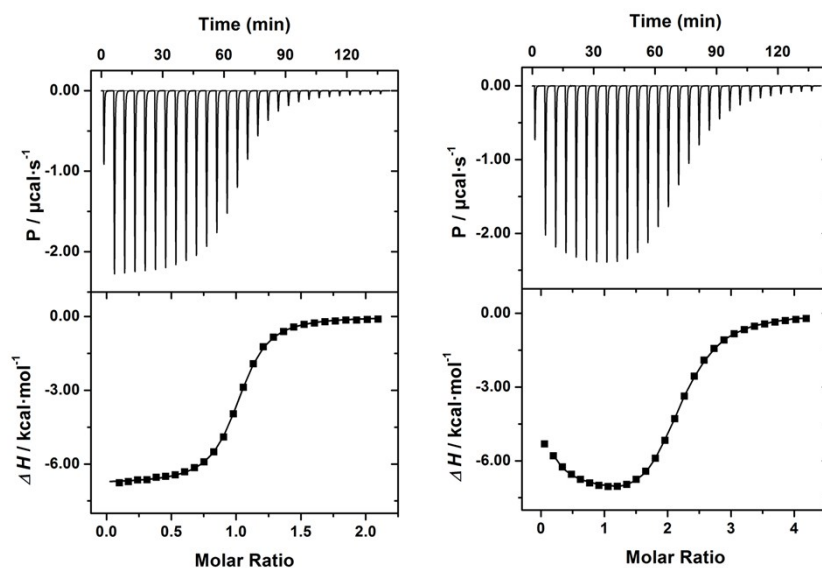

**Fig. S3** Fitting the ITC data for titration experiments of a) NpTA (1.0 mM) into CB[7] (0.1 mM) with a one-sites binding model and b) NpTA (1.0 mM) into CB[8] (0.05 mM) with a sequential binding model.

As shown in Fig. S3, the binding constant of Np and CB[7] was  $7.80 \times 10^5 \text{ M}^{-1}$ , and the two step binding constant of Np and CB[8] was  $K_{a1} = 5.53 \times 10^5 \text{ M}^{-1}$  and  $K_{a2} = 2.90 \times 10^5 \text{ M}^{-1}$ .

(2) Host-guest interaction between  $C_4$  and CB[7]

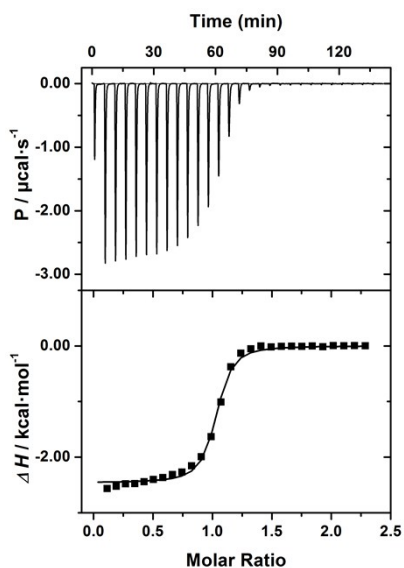

**Fig. S4** Fitting the ITC data for titration experiments of a)  $C_4DA$  (1.0 mM) into CB[7] (0.1 mM) with a one-sites binding model.

As shown in Fig. S4, the binding constant of  $C_4$  and CB[7] was  $7.71 \times 10^5 \text{ M}^{-1}$ , and the binding of  $C_4$  and CB[8] could not be detected.

(3) Host-guest interaction between  $C_6$  and cucurbiturils

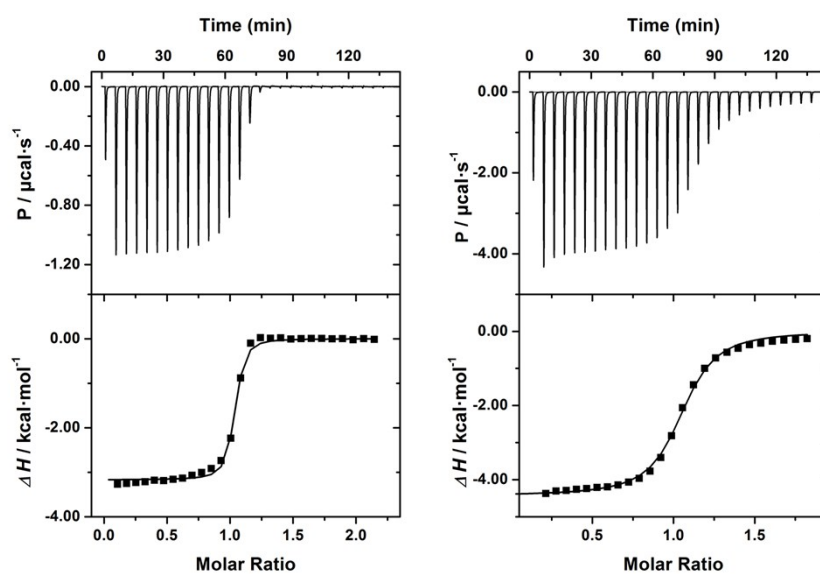

**Fig. S5** Fitting the ITC data for titration experiments of a) C<sub>6</sub>DA (1.0 mM) into CB[8] (0.1 mM) with a one-sites binding model and b) CB[7] (3.0 mM) into C<sub>6</sub>DA-CB[8] (0.3 mM) with a competitive binding model.

As shown in Fig. S5, the binding constant of C<sub>6</sub> and CB[7] was  $1.19 \times 10^9 \text{ M}^{-1}$ , and the binding constant of C<sub>6</sub> and CB[8] was  $7.10 \times 10^6 \text{ M}^{-1}$ .

(4) Host-guest interaction between C<sub>8</sub> and cucurbiturils

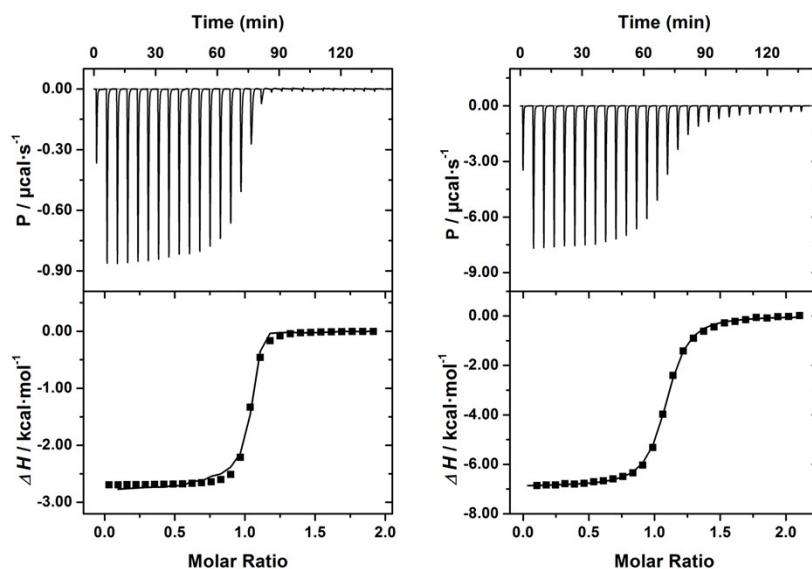

**Fig. S6** Fitting the ITC data for titration experiments of a) C<sub>8</sub>DA (1.0 mM) into CB[8] (0.1 mM) with a one-sites binding model and b) CB[7] (3.0 mM) into C<sub>8</sub>DA-CB[8] (0.3 mM) with a competitive binding model.

As shown in Fig. S6, the binding constant of C<sub>8</sub> and CB[7] was  $2.16 \times 10^9 \text{ M}^{-1}$ , and the binding constant of C<sub>8</sub> and CB[8] was  $7.79 \times 10^6 \text{ M}^{-1}$ .

(5) Host-guest interaction between C<sub>10</sub> and cucurbiturils

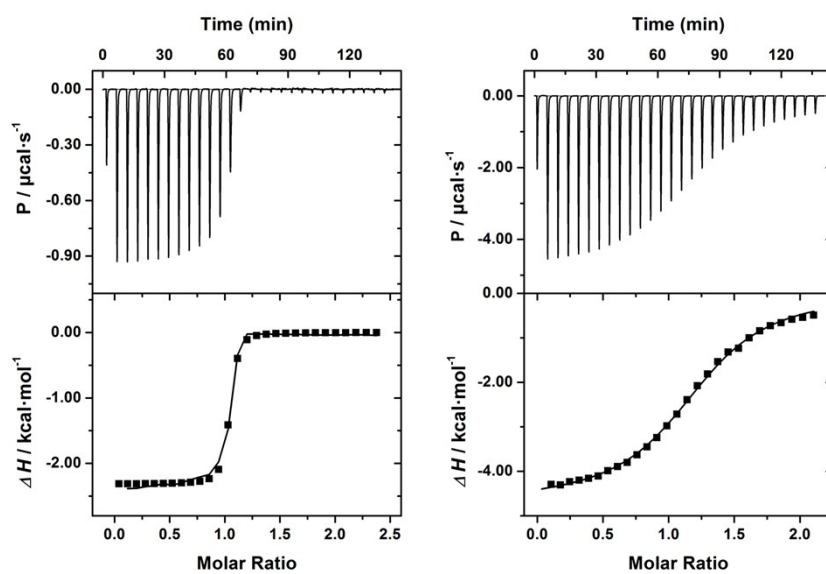

**Fig. S7** Fitting the ITC data for titration experiments of a) C<sub>10</sub>DA (1.0 mM) into CB[8] (0.1 mM) with a one-sites binding model and b) CB[7] (3.0 mM) into C<sub>10</sub>DA-CB[8] (0.3 mM) with a competitive binding model.

As shown in Fig. S7, the binding constant of C<sub>10</sub> and CB[7] was  $2.27 \times 10^8 \text{ M}^{-1}$ , and the binding constant of C<sub>10</sub> and CB[8] was  $9.34 \times 10^6 \text{ M}^{-1}$ .
